# Supplementary material
Source: publisher figshare collection journal article supplement (https://tandf.figshare.com/ndownloader/files/18665690)
Supplement: Supplementary file 1 [file 18665690]

## Collaborative Leadership in EMU Governance: A Matter of Cognitive Proximity

Henriette Müller, *New York University Abu Dhabi, Abu Dhabi, United Arab Emirates* and Femke A.W.J. van Esch, *Utrecht School of Governance, Utrecht University, Utrecht, The Netherlands*

### Online Appendix

#### 1) Questionnaire of the Expert Survey

|                                                                                                                                                                                                                                                                                                           |              |                   |         |                |       |
|-----------------------------------------------------------------------------------------------------------------------------------------------------------------------------------------------------------------------------------------------------------------------------------------------------------|--------------|-------------------|---------|----------------|-------|
| 1. How would you identify yourself? (Choose one of the following answers. Please choose <b>only one</b> of the following):                                                                                                                                                                                |              |                   |         |                |       |
| Academic                                                                                                                                                                                                                                                                                                  | Practitioner | Both              | Other   |                |       |
| 2. Please provide your expert judgement about the <i>collaboration</i> between <b>Helmut Kohl, François Mitterrand</b> and <b>Jacques Delors</b> in the run up to the establishment of the European Economic and Monetary Union. (Please choose the appropriate response for each item):                  |              |                   |         |                |       |
| The trio collaborated well during the decision-making process leading to the foundation of EMU.                                                                                                                                                                                                           | Disagree     | Somewhat Disagree | Neutral | Somewhat Agree | Agree |
| The trio decided collectively on their actions during the decision-making process leading to the establishment of EMU                                                                                                                                                                                     | Disagree     | Somewhat Disagree | Neutral | Somewhat Agree | Agree |
| The trio determined the speed and direction of their actions during the decision-making process on the establishment of EMU together.                                                                                                                                                                     | Disagree     | Somewhat Disagree | Neutral | Somewhat Agree | Agree |
| 3. Please provide your expert judgement about the <i>success</i> of <b>Helmut Kohl, François Mitterrand</b> and <b>Jacques Delors</b> to realize their policy goals with regard to the establishment of the European Economic and Monetary Union. (Please choose the appropriate response for each item): |              |                   |         |                |       |
| The trio was successful in establishing EMU.                                                                                                                                                                                                                                                              | Disagree     | Somewhat Disagree | Neutral | Somewhat Agree | Agree |

|                                                                                                                                                                                                                                                                                                      |          |                   |         |                |       |
|------------------------------------------------------------------------------------------------------------------------------------------------------------------------------------------------------------------------------------------------------------------------------------------------------|----------|-------------------|---------|----------------|-------|
| The establishment of EMU constituted the successful realization of the shared policy goals of Kohl, Mitterrand and Delors                                                                                                                                                                            | Disagree | Somewhat Disagree | Neutral | Somewhat Agree | Agree |
| 4. Please provide your expert judgement about the <i>collaboration</i> between <b>Gerhard Schröder</b> , <b>Jacques Chirac</b> and <b>Romano Prodi</b> in the run up to the introduction of the Euro to the public in 2002. (Please choose the appropriate response for each item):                  |          |                   |         |                |       |
| The trio collaborated well in the run up to the introduction of the Euro to the public in 2002.                                                                                                                                                                                                      | Disagree | Somewhat Disagree | Neutral | Somewhat Agree | Agree |
| The trio decided collectively on their actions in the run up to the introduction of the Euro.                                                                                                                                                                                                        | Disagree | Somewhat Disagree | Neutral | Somewhat Agree | Agree |
| The trio determined the speed and direction of their actions in the run up to the introduction of the Euro to the public together.                                                                                                                                                                   | Disagree | Somewhat Disagree | Neutral | Somewhat Agree | Agree |
| 5. Please provide your expert judgement about the <i>success</i> of <b>Gerhard Schröder</b> , <b>Jacques Chirac</b> and <b>Romano Prodi</b> to realize their policy goals with regard to the introduction of the Euro to the public in 2002. (Please choose the appropriate response for each item): |          |                   |         |                |       |
| The trio was successful in introducing the Euro to the public in 2002.                                                                                                                                                                                                                               | Disagree | Somewhat Disagree | Neutral | Somewhat Agree | Agree |
| The introduction of the Euro to the public constituted the successful realization of the shared policy goals of Schröder, Chirac and Prodi.                                                                                                                                                          | Disagree | Somewhat Disagree | Neutral | Somewhat Agree | Agree |
| 6. Please provide your expert judgement about the <i>collaboration</i> between <b>Angela Merkel</b> , <b>Nicolas Sarkozy</b> and <b>José Barroso</b> in the run up to the establishment of the first fiscal support package in May 2010. (Please choose the appropriate response for each item):     |          |                   |         |                |       |

|                                                                                                                                                                                                                                                                                                                                    |          |                   |         |                |       |
|------------------------------------------------------------------------------------------------------------------------------------------------------------------------------------------------------------------------------------------------------------------------------------------------------------------------------------|----------|-------------------|---------|----------------|-------|
| The trio collaborated well in the run up to the instatement of the fiscal support package in May 2010.                                                                                                                                                                                                                             | Disagree | Somewhat Disagree | Neutral | Somewhat Agree | Agree |
| The trio decided collectively on their actions in the run up to the fiscal support package established in May 2010.                                                                                                                                                                                                                | Disagree | Somewhat Disagree | Neutral | Somewhat Agree | Agree |
| The trio determined the speed and direction of their actions in the run up to the fiscal support package together.                                                                                                                                                                                                                 | Disagree | Somewhat Disagree | Neutral | Somewhat Agree | Agree |
| 7. Please provide your expert judgement about the <i>success</i> of <b>Angela Merkel, Nicolas Sarkozy</b> and <b>José Barroso</b> to realize their policy goals with regard to the establishment of the fiscal support package in 2010. (Please choose the appropriate response for each item):                                    |          |                   |         |                |       |
| The trio was successful in establishing the fiscal support package in 2010.                                                                                                                                                                                                                                                        | Disagree | Somewhat Disagree | Neutral | Somewhat Agree | Agree |
| The establishment of the fiscal support package in 2010 constituted the successful realization of the shared policy goals of Merkel, Sarkozy and Barroso.                                                                                                                                                                          | Disagree | Somewhat Disagree | Neutral | Somewhat Agree | Agree |
| 8. Please provide your expert judgement about the <i>collaboration</i> between <b>Angela Merkel, François Hollande</b> and <b>Jean-Claude Juncker</b> in negotiating on the second and third fiscal support packages with the Syriza government in the first half of 2015. (Please choose the appropriate response for each item): |          |                   |         |                |       |
| The trio collaborated well during the negotiations on the fiscal support packages with the Syriza government in the first half of 2015.                                                                                                                                                                                            | Disagree | Somewhat Disagree | Neutral | Somewhat Agree | Agree |

|                                                                                                                                                                                                                                                                                                                         |          |                   |         |                |       |
|-------------------------------------------------------------------------------------------------------------------------------------------------------------------------------------------------------------------------------------------------------------------------------------------------------------------------|----------|-------------------|---------|----------------|-------|
| The trio decided collectively on their actions during the negotiations on the fiscal support packages with the Syriza government in the first half of 2015.                                                                                                                                                             | Disagree | Somewhat Disagree | Neutral | Somewhat Agree | Agree |
| The trio determined the speed and direction of their actions during the negotiations on the fiscal support packages with the Syriza government in the first half of 2015 together.                                                                                                                                      | Disagree | Somewhat Disagree | Neutral | Somewhat Agree | Agree |
| 9. Please provide your expert judgement about the <i>success</i> of <b>Angela Merkel, François Hollande</b> and <b>Jean-Claude Juncker</b> in negotiating on the second and third fiscal support packages with the Syriza government in the first half of 2015. (Please choose the appropriate response for each item): |          |                   |         |                |       |
| The trio was successful in negotiating a third fiscal support package with the Syriza government in 2015.                                                                                                                                                                                                               | Disagree | Somewhat Disagree | Neutral | Somewhat Agree | Agree |
| The negotiation of the third fiscal support package with the Syriza government in 2015 constituted the successful realization of the shared policy goals of Merkel, Hollande and Juncker.                                                                                                                               | Disagree | Somewhat Disagree | Neutral | Somewhat Agree | Agree |
